# Supplementary material
Source: publisher site journal article supplement (https://www.dovepress.com/article/170873)
Supplement: Supplementary file 1 [file get_supplementary_file.php]

**Table S1 List of ICD-10 codes**

| <b>Comorbidity/Risk factor</b>      | <b>ICD-10 code</b> |
|-------------------------------------|--------------------|
| Hypertension                        | I10-I13, I15       |
| Atrial fibrillation                 | I48                |
| Ischemic heart disease <sup>d</sup> | I20-I22            |
| Diabetes mellitus                   | E10-E14            |
| Cancer                              | C00-C97            |
| Anemia                              | D50-D64            |
| Cerebrovascular disease             | I60-I69            |
| Dyslipidemia                        | E78                |
| Aortic insufficiency/regurgitation  | I06, I35, Q23.1    |
| Mild cognitive disorder             | F06.7, G31.84      |
