# Supplementary material
Source: publisher site journal article supplement (https://www.dovepress.com/article/170873)
Supplement: Supplementary file 2 [file get_supplementary_file.php]

**Table S2** Total age-adjusted incidence per 1,000 inhabitants and prevalence of HF during 2010–2014 by sex in Sweden, overall (cohort 1) and in the counties of Uppsala and Västerbotten (cohort 2)

|                             | 2010             | 2011             | 2012             | 2013             | 2014             |
|-----------------------------|------------------|------------------|------------------|------------------|------------------|
| <b>Incidence, cohort 1</b>  |                  |                  |                  |                  |                  |
| Men                         | 3.41 (3.35–3.47) | 3.43 (3.37–3.48) | 3.33 (3.27–3.38) | 3.25 (3.19–3.30) | 3.08 (3.02–3.13) |
| Women                       | 2.85 (2.80–2.91) | 2.85 (2.80–2.90) | 2.85 (2.80–2.90) | 2.70 (2.64–2.75) | 2.61 (2.56–2.66) |
| <b>Incidence, cohort 2</b>  |                  |                  |                  |                  |                  |
| Men                         | 4.50 (4.23–4.77) | 4.14 (3.88–4.39) | 3.86 (3.62–4.11) | 3.76 (3.52–4.01) | 3.53 (3.30–3.77) |
| Women                       | 4.19 (3.93–4.45) | 3.77 (3.53–4.02) | 3.40 (3.17–3.63) | 3.60 (3.37–3.84) | 3.12 (2.90–3.34) |
| <b>Prevalence, cohort 1</b> |                  |                  |                  |                  |                  |
| Men                         | 1.82 (1.81–1.84) | 1.87 (1.86–1.89) | 1.91 (1.90–1.93) | 1.93 (1.92–1.95) | 1.94 (1.93–1.96) |
| Women                       | 1.34 (1.33–1.35) | 1.37 (1.36–1.39) | 1.41 (1.40–1.42) | 1.41 (1.40–1.43) | 1.42 (1.41–1.43) |
| <b>Prevalence, cohort 2</b> |                  |                  |                  |                  |                  |
| Men                         | 2.30 (2.24–2.36) | 2.37 (2.30–2.43) | 2.38 (2.32–2.44) | 2.37 (2.31–2.43) | 2.34 (2.28–2.40) |
| Women                       | 2.02 (1.96–2.07) | 2.07 (2.01–2.12) | 2.07 (2.02–2.13) | 2.09 (2.03–2.14) | 2.03 (1.98–2.09) |

Data are mean (CI) and based on data from the NPR (cohorts 1 and 2) and from primary and secondary care EMRs (cohort 2) for the period 2010–2014. Second HF diagnosis used as the index date. Age-adjusted incidence and prevalence calculated using population weights based on the Swedish population in 2015.<sup>16</sup>

**Abbreviations:** CI, confidence interval; EMRs, electronic medical record; HF, heart failure; NPR, National Patient Register.
