# Supplementary material
Source: publisher site journal article supplement (https://www.dovepress.com/article/170873)
Supplement: Supplementary file 3 [file get_supplementary_file.php]

**Table S3** Patient characteristics by year of HF diagnosis in the incident patient population (cohort 1)

|                                               | 2006          | 2007          | 2008          | 2009          | 2010          | 2011          | 2012          | 2013          | <i>P</i> value |
|-----------------------------------------------|---------------|---------------|---------------|---------------|---------------|---------------|---------------|---------------|----------------|
| Total number of patients                      | 20,442        | 20,648        | 21,310        | 20,779        | 20,530        | 19,653        | 18,245        | 12,717        |                |
| Mean age, years (SD)                          | 77.3 (11.7)   | 77.3 (11.8)   | 77.5 (11.7)   | 77.7 (11.9)   | 77.7 (12.0)   | 77.4 (12.3)   | 77.3 (12.4)   | 77.1 (12.6)   | 0.4700         |
| Sex, <i>n</i> (% male)                        | 10,842 (53.0) | 10,949 (53.0) | 11,211 (52.6) | 10,892 (52.4) | 10,812 (52.7) | 10,506 (53.5) | 9,815 (53.8)  | 6,971 (54.8)  | 0.0007         |
| Mean CCI <sup>a</sup> (SD)                    | 1.4 (1.8)     | 1.4 (1.9)     | 1.5 (1.9)     | 1.5 (2.0)     | 1.5 (2.0)     | 1.6 (2.1)     | 1.6 (2.1)     | 1.7 (2.2)     | <0.0001        |
| Prior MI, <sup>a</sup> <i>n</i> (%)           | 2,753 (13.5)  | 2,734 (13.2)  | 2,763 (13.0)  | 2,558 (12.3)  | 2,401 (11.7)  | 2,305 (11.7)  | 2,144 (11.8)  | 1,368 (10.8)  | <0.0001        |
| Inpatient at first HF diagnosis, <i>n</i> (%) | 16,373 (80.1) | 16,316 (79.0) | 16,993 (79.7) | 16,520 (79.5) | 16,418 (80.0) | 15,651 (79.6) | 14,540 (79.7) | 10,199 (80.2) | 0.3757         |

<sup>a</sup>At 0–5 years before year of HF diagnosis. Note: the year 2005 was excluded owing to outpatient diagnoses only being available from 2001.

**Abbreviations:** CCI, Charlson comorbidity index; HF, heart failure; MI, myocardial infarction; SD, standard deviation.
