# Supplementary material
Source: publisher site journal article supplement (https://www.dovepress.com/article/170873)
Supplement: Supplementary file 4 [file get_supplementary_file.php]

**Table S4** Cox and Fine and Gray regression analyses of 3-year all-cause and CVD-related mortality with Kaplan–Meier and cumulative incidence function estimates for 3-year mortality (cohort 1, incident HF population)

|                             | <i>N</i><br>( <i>N</i> =174,537) | All-cause mortality<br>Median survival, days <sup>a</sup> | CVD-related mortality<br>Median survival, days <sup>b</sup> | 3-year<br>All-cause<br>Mortality (95%CI) <sup>c,d</sup> | 3-year<br>CVD-related<br>mortality (95%CI) <sup>d,e</sup> |
|-----------------------------|----------------------------------|-----------------------------------------------------------|-------------------------------------------------------------|---------------------------------------------------------|-----------------------------------------------------------|
| <b>Age, years</b>           |                                  |                                                           |                                                             |                                                         |                                                           |
| 18–54                       | 9,041                            | –                                                         | –                                                           | 10.4% (9.7%,11.0%)                                      | 4.7% (4.2%,5.1%)                                          |
| 55–64                       | 17,281                           | –                                                         | –                                                           | 18.9% (18.3%,19.5%)                                     | 10.0% (9.6%,10.5%)                                        |
| 65–74                       | 34,159                           | 2,346                                                     | –                                                           | 30.2% (29.7%,30.7%)                                     | 16.0% (15.6%,16.4%)                                       |
| 75–84                       | 62,859                           | 1,063                                                     | 3,355                                                       | 50.8% (50.4%,51.3%)                                     | 28.7% (28.3%,29.0%)                                       |
| ≥85                         | 51,197                           | 438                                                       | 1,489                                                       | 73.9% (73.5%,74.3%)                                     | 44.9% (44.4%,45.3%)                                       |
| <b>Sex</b>                  |                                  |                                                           |                                                             |                                                         |                                                           |
| Women                       | 81,797                           | 1,015                                                     | -                                                           | 51.9% (51.6%,52.3%)                                     | 30.4% (30.1%,30.7%)                                       |
| Men                         | 92,740                           | 1,361                                                     | -                                                           | 45.0% (44.7%,45.4%)                                     | 25.6% (25.3%,25.9%)                                       |
| <b>Year of HF diagnosis</b> |                                  |                                                           |                                                             |                                                         |                                                           |
| 2005                        | 10,737                           | 1,218                                                     | –                                                           | 47.8% (46.8%,48.7%)                                     | 28.7% (27.9%,29.6%)                                       |
| 2006                        | 15,749                           | 1,192                                                     | –                                                           | 48.0% (47.3%,48.8%)                                     | 29.3% (28.6%,30.0%)                                       |
| 2007                        | 18,359                           | 1,203                                                     | –                                                           | 47.9% (47.2%,48.6%)                                     | 28.8% (28.1%,29.4%)                                       |
| 2008                        | 19,950                           | 1,165                                                     | –                                                           | 48.6% (47.9%,49.3%)                                     | 28.2% (27.6%,28.8%)                                       |
| 2009                        | 21,017                           | 1,162                                                     | –                                                           | 48.5% (47.8%,49.1%)                                     | 27.8% (27.2%,28.4%)                                       |
| 2010                        | 21,633                           | 1,158                                                     | –                                                           | 48.7% (48.0%,49.4%)                                     | 28.0% (27.4%,28.6%)                                       |
| 2011                        | 22,485                           | 1,189                                                     | –                                                           | 48.1% (47.4%,48.7%)                                     | 27.2% (26.7%,27.8%)                                       |
| 2012                        | 22,594                           | –                                                         | –                                                           | -                                                       | –                                                         |
| 2013                        | 22,013                           | –                                                         | –                                                           | -                                                       | –                                                         |

<sup>a</sup>Patients are censored at emigration (loss to follow-up) and at end of follow-up (31 December 2014).

<sup>b</sup>Patients are censored at emigration, at death due to non-CVD causes and at end of follow-up (31 December 2014).

<sup>c</sup>Kaplan–Meier estimates of mortality (1–survival).

<sup>d</sup>End of follow-up restricted to 1 year after second observed HF diagnosis.

<sup>e</sup>cumulative incidence function estimates of mortality (1–survival).

**Abbreviations:** CI, confidence interval; CVD, cardiovascular disease; HF, heart failure.
