# Supplementary material
Source: publisher site journal article supplement (https://www.dovepress.com/article/170873)
Supplement: Supplementary file 5 [file get_supplementary_file.php]

**Table S5** Cox and Fine and Gray regression analyses of 1-year all-cause and CVD-related mortality with Kaplan–Meier and cumulative incidence function estimates for 1-year mortality (Sensitivity analysis of national cohort with at least 1 HF diagnosis, incident HF population)

|                             | <i>N</i><br>( <b>N=282,893</b> ) | <b>1-year All-cause mortality<sup>a</sup></b> |                                   | <b>1-year CVD-related mortality<sup>b</sup></b> |                                    |
|-----------------------------|----------------------------------|-----------------------------------------------|-----------------------------------|-------------------------------------------------|------------------------------------|
|                             |                                  | <b>Mortality (95%CI)<sup>c</sup></b>          | <b>HR (95%CI)<sup>c,d,e</sup></b> | <b>Mortality (95%CI)<sup>f</sup></b>            | <b>SHR (95%CI)<sup>e,f,g</sup></b> |
| <b>Age, years</b>           |                                  |                                               |                                   |                                                 |                                    |
| <b>18–54</b>                | 13,759                           | 7.0% (6.5%,7.4%)                              | 1 (reference)                     | 2.5% (2.2%,2.7%)                                | 1 (reference)                      |
| <b>55–64</b>                | 26,155                           | 11.3% (10.9%,11.7%)                           | 1.66 (1.54,1.78)                  | 5.2% (5.0%,5.5%)                                | 2.15 (1.91,2.42)                   |
| <b>65–74</b>                | 52,941                           | 16.8% (16.5%,17.1%)                           | 2.56 (2.40,2.74)                  | 8.1% (7.8%,8.3%)                                | 3.40 (3.05,3.80)                   |
| <b>75–84</b>                | 98,697                           | 26.9% (26.6%,27.2%)                           | 4.39 (4.12,4.68)                  | 14.6% (14.4%,14.8%)                             | 6.40 (5.75,7.13)                   |
| <b>≥85</b>                  | 91,341                           | 44.0% (43.7%,44.3%)                           | 8.24 (7.73,8.79)                  | 26.3% (26.0%,26.6%)                             | 12.60 (11.32,14.04)                |
| <b>Sex</b>                  |                                  |                                               |                                   |                                                 |                                    |
| <b>Women</b>                | 137,831                          | 29.6% (29.4%,29.8%)                           | 1 (reference)                     | 16.8% (16.6%,17.0%)                             | 1 (reference)                      |
| <b>Men</b>                  | 145,062                          | 26.7% (26.5%,27.0%)                           | 1.13 (1.11,1.14)                  | 14.6% (14.4%,14.8%)                             | 1.10 (1.08,1.12)                   |
| <b>Year of HF diagnosis</b> |                                  |                                               |                                   |                                                 |                                    |
| <b>2005</b>                 | 31,217                           | 28.9% (28.4%,29.4%)                           | 1 (reference)                     | 16.9% (16.5%,17.3%)                             | 1 (reference)                      |
| <b>2006</b>                 | 31,512                           | 28.5% (28.0%,29.0%)                           | 0.97 (0.94,1.00)                  | 16.7% (16.3%,17.1%)                             | 0.97 (0.94,1.01)                   |
| <b>2007</b>                 | 31,484                           | 28.3% (27.8%,28.7%)                           | 0.96 (0.93,0.99)                  | 16.2% (15.8%,16.6%)                             | 0.95 (0.91,0.98)                   |
| <b>2008</b>                 | 32,265                           | 28.1% (27.6%,28.6%)                           | 0.95 (0.92,0.98)                  | 15.6% (15.2%,16.0%)                             | 0.90 (0.87,0.94)                   |
| <b>2009</b>                 | 31,609                           | 28.0% (27.5%,28.5%)                           | 0.93 (0.90,0.96)                  | 15.4% (15.0%,15.8%)                             | 0.88 (0.84,0.91)                   |
| <b>2010</b>                 | 31,840                           | 27.8% (27.3%,28.3%)                           | 0.93 (0.90,0.95)                  | 15.7% (15.3%,16.1%)                             | 0.90 (0.86,0.93)                   |
| <b>2011</b>                 | 31,404                           | 27.8% (27.3%,28.3%)                           | 0.93 (0.90,0.96)                  | 15.1% (14.7%,15.5%)                             | 0.86 (0.83,0.89)                   |
| <b>2012</b>                 | 31,534                           | 28.2% (27.7%,28.7%)                           | 0.94 (0.91,0.97)                  | 15.2% (14.8%,15.6%)                             | 0.87 (0.83,0.90)                   |
| <b>2013</b>                 | 30,028                           | 27.6% (27.1%,28.1%)                           | 0.92 (0.89,0.95)                  | 14.5% (14.1%,14.9%)                             | 0.82 (0.79,0.86)                   |

<sup>a</sup>Patients are censored at emigration (loss to follow-up) and at end of follow-up (31 December 2014).

<sup>b</sup>Patients are censored at emigration, at death due to non-CVD causes and at end of follow-up (31 December 2014).

<sup>c</sup>Kaplan–Meier estimates of mortality (1–survival).

<sup>d</sup>Cox Multivariate HR, adjusted for age group, sex and year of HF diagnosis.

<sup>e</sup>End of follow-up restricted to 1 year after second observed HF diagnosis.

<sup>f</sup>cumulative incidence function estimates of mortality (1–survival).

<sup>g</sup>Subdistribution HR, adjusted for age group, sex and year of HF diagnosis.

**Abbreviations:** CI, confidence interval; CVD, cardiovascular disease; HF, heart failure; HR, hazard ratio; SHR, sub-distribution hazard ratio.
