# Supplementary material
Source: publisher site journal article supplement (https://www.dovepress.com/article/170873)
Supplement: Supplementary file 6 [file get_supplementary_file.php]

**Table S6** Cox and Fine and Gray regression analyses of 3-year all-cause and CVD-related mortality with Kaplan–Meier and cumulative incidence function estimates for 3-year mortality (Sensitivity analysis of national cohort with at least 1 HF diagnosis, incident HF population)

|                             | <i>N</i><br>(N=282,893) | All-cause mortality<br>Median survival, days <sup>a</sup> | CVD-related mortality<br>Median survival, days <sup>b</sup> | 3-year<br>All-cause<br>Mortality (95%CI) <sup>c,d</sup> | 3-year<br>CVD-related<br>mortality (95%CI) <sup>d,e</sup> |
|-----------------------------|-------------------------|-----------------------------------------------------------|-------------------------------------------------------------|---------------------------------------------------------|-----------------------------------------------------------|
| <b>Age, years</b>           |                         |                                                           |                                                             |                                                         |                                                           |
| <b>18–54</b>                | 13,759                  | –                                                         | –                                                           | 11.3% (10.8%,11.9%)                                     | 4.4% (4.1%,4.8%)                                          |
| <b>55–64</b>                | 26,155                  | –                                                         | –                                                           | 19.0% (18.5%,19.5%)                                     | 9.2% (8.8%,9.5%)                                          |
| <b>65–74</b>                | 52,941                  | 2,668                                                     | –                                                           | 28.6% (28.2%,29.0%)                                     | 14.2% (13.9%,14.5%)                                       |
| <b>75–84</b>                | 98,697                  | 1,283                                                     | –                                                           | 45.8% (45.4%,46.1%)                                     | 25.0% (24.7%,25.3%)                                       |
| <b>≥85</b>                  | 91,341                  | 507                                                       | 1,782                                                       | 69.4% (69.1%,69.7%)                                     | 41.3% (40.9%,41.6%)                                       |
| <b>Sex</b>                  |                         |                                                           |                                                             |                                                         |                                                           |
| <b>Women</b>                | 137,831                 | 1,160                                                     | –                                                           | 48.6% (48.3%,48.9%)                                     | 27.7% (27.4%,27.9%)                                       |
| <b>Men</b>                  | 145,062                 | 1,447                                                     | –                                                           | 43.6% (43.3%,43.8%)                                     | 23.9% (23.7%,24.2%)                                       |
| <b>Year of HF diagnosis</b> |                         |                                                           |                                                             |                                                         |                                                           |
| <b>2005</b>                 | 31,217                  | 1,246                                                     | –                                                           | 46.9% (46.3%,47.4%)                                     | 27.5% (27.0%,28.0%)                                       |
| <b>2006</b>                 | 31,512                  | 1,272                                                     | –                                                           | 46.7% (46.1%,47.2%)                                     | 27.3% (26.8%,27.8%)                                       |
| <b>2007</b>                 | 31,484                  | 1,316                                                     | –                                                           | 45.7% (45.1%,46.2%)                                     | 26.3% (25.8%,26.8%)                                       |
| <b>2008</b>                 | 32,265                  | 1,307                                                     | –                                                           | 45.8% (45.2%,46.3%)                                     | 25.6% (25.1%,26.1%)                                       |
| <b>2009</b>                 | 31,609                  | 1,279                                                     | –                                                           | 46.1% (45.5%,46.6%)                                     | 25.4% (24.9%,25.9%)                                       |
| <b>2010</b>                 | 31,840                  | 1,301                                                     | –                                                           | 46.0% (45.4%,46.5%)                                     | 25.8% (25.3%,26.3%)                                       |
| <b>2011</b>                 | 31,404                  | 1,328                                                     | –                                                           | 45.6% (45.1%,46.2%)                                     | 24.8% (24.3%,25.3%)                                       |
| <b>2012</b>                 | 31,534                  | –                                                         | –                                                           | –                                                       | 24.6% (24.0%,25.1%)                                       |
| <b>2013</b>                 | 30,028                  | –                                                         | –                                                           | –                                                       | –                                                         |

<sup>a</sup>Patients are censored at emigration (loss to follow-up) and at end of follow-up (31 December 2014).

<sup>b</sup>Patients are censored at emigration, at death due to non-CVD causes and at end of follow-up (31 December 2014).

<sup>c</sup>Kaplan–Meier estimates of mortality (1–survival).

<sup>d</sup>End of follow-up restricted to 1 year after second observed HF diagnosis.

<sup>e</sup>cumulative incidence function estimates of mortality (1–survival).

**Abbreviations:** CI, confidence interval; CVD, cardiovascular disease; HF, heart failure.
