# Supplementary material
Source: publisher site journal article supplement (https://www.dovepress.com/article/170873)
Supplement: Supplementary file 7 [file get_supplementary_file.php]

**Table S7** Regression analyses of 3-year all-cause and CVD-related mortality with Kaplan–Meier and cumulative incidence function estimates for 3-year mortality (cohort 2, incident HF population)

|                               | <i>N</i><br>(N=6,522) | All-cause mortality<br>Median survival, days <sup>a</sup> | CVD-related mortality<br>Median survival, days <sup>b</sup> | 3-year<br>All-cause<br>Mortality <sup>c,d</sup> | 3-year<br>CVD-related<br>mortality <sup>d,e</sup> |
|-------------------------------|-----------------------|-----------------------------------------------------------|-------------------------------------------------------------|-------------------------------------------------|---------------------------------------------------|
| <b>18–54</b>                  | 395                   | –                                                         | –                                                           | 9.7% (6.5%,13.0%)                               | 3.7% (2.0%,6.3%)                                  |
| <b>55–64</b>                  | 652                   | –                                                         | –                                                           | 15.7% (12.6%,18.7%)                             | 7.1% (5.1%,9.5%)                                  |
| <b>65–74</b>                  | 1,460                 | –                                                         | –                                                           | 18.3% (16.0%,20.5%)                             | 7.6% (6.2%,9.2%)                                  |
| <b>75–84</b>                  | 2,228                 | 1,799                                                     | –                                                           | 28.6% (26.4%,30.8%)                             | 12.4% (10.9%,14.0%)                               |
| <b>≥85</b>                    | 1,787                 | 997                                                       | –                                                           | 52.9% (50.1%,55.8%)                             | 27.9% (25.6%,30.2%)                               |
| <b>Sex</b>                    |                       |                                                           |                                                             |                                                 |                                                   |
| <b>Women</b>                  | 3,024                 | 1,796                                                     | –                                                           | 31.7% (29.8%,33.6%)                             | 16.3% (14.9%,17.8%)                               |
| <b>Men</b>                    | 3,498                 | –                                                         | –                                                           | 28.4% (26.6%,30.1%)                             | 12.8% (11.6%,14.1%)                               |
| <b>HF diagnosis setting</b>   |                       |                                                           |                                                             |                                                 |                                                   |
| <b>Primary</b>                | 1,558                 | –                                                         | –                                                           | 19.5% (17.0%,21.9%)                             | 11.0% (9.3%,12.9%)                                |
| <b>Secondary</b>              | 4,964                 | 1,799                                                     | –                                                           | 33.1% (31.6%,34.5%)                             | 15.5% (14.4%,16.6%)                               |
| <b>HF phenotype</b>           |                       |                                                           |                                                             |                                                 |                                                   |
| <b>HFpEF</b>                  | 826                   | 1,746                                                     | –                                                           | 34.8% (31.1%,38.4%)                             | 14.0% (11.5%,16.7%)                               |
| <b>HFrEF</b>                  | 1,536                 | –                                                         | –                                                           | 25.5% (23.1%,28.0%)                             | 13.1% (11.3%,15.0%)                               |
| <b>Unknown</b>                | 4,160                 | –                                                         | –                                                           | 30.5% (28.9%,32.2%)                             | 15.1% (13.9%,16.3%)                               |
| <b>NT-proBNP level, pg/mL</b> |                       |                                                           |                                                             |                                                 |                                                   |
| <b>0–300</b>                  | 369                   | –                                                         | –                                                           | 12.0% (8.3%,15.7%)                              | 5.6% (3.4%,8.6%)                                  |
| <b>301–1,000</b>              | 946                   | –                                                         | –                                                           | 22.4% (19.3%,25.5%)                             | 10.9% (8.8%,13.3%)                                |

|                             |       |       |   |                     |                     |
|-----------------------------|-------|-------|---|---------------------|---------------------|
| <b>1,001–3,000</b>          | 1,813 | 1,799 | – | 25.9% (23.5%,28.2%) | 12.7% (11.0%,14.5%) |
| <b>&gt;3,000</b>            | 2,253 | 1,626 | – | 39.6% (37.2%,42.0%) | 19.2% (17.4%,21.0%) |
| <b>Year of HF diagnosis</b> |       |       |   |                     |                     |
| <b>2010</b>                 | 1,392 | –     | – | 32.8% (30.3%,35.3%) | 15.3% (13.5%,17.3%) |
| <b>2011</b>                 | 1,644 | –     | – | 29.1% (26.8%,31.3%) | 14.0% (12.4%,15.8%) |
| <b>2012</b>                 | 1,661 | –     | – | –                   | –                   |
| <b>2013</b>                 | 1,825 | –     | – | –                   | –                   |

<sup>a</sup>Patients are censored at emigration (loss to follow-up) and at end of follow-up (31 December 2014).

<sup>b</sup>Patients are censored at emigration, at death due to non-CVD causes and at end of follow-up (31 December 2014).

<sup>c</sup>Kaplan–Meier estimates of mortality (1–survival).

<sup>d</sup>End of follow-up restricted to 1 year after second observed HF diagnosis.

<sup>e</sup>cumulative incidence function estimates of mortality (1–survival).

**Abbreviations:** CI, confidence interval; CVD, cardiovascular disease; HF, heart failure; HR, hazard ratio, NT-proBNP, N-terminal pro-B-type natriuretic peptide; SHR, sub-distribution hazard ratio.
